# Supplementary material
Source: MDPI journal article supplement (https://www.mdpi.com/2076-3417/14/6/2433)
Supplement: s1 [file s1]

## Supplementary Materials:

**Table S1. List of papers included in the SLR study.**

| #  | Paper                                                                                                                                                                   | Source |
|----|-------------------------------------------------------------------------------------------------------------------------------------------------------------------------|--------|
| 1  | MSA-GA: multiple sequence alignment tool based on genetic approach.                                                                                                     | [21]   |
| 2  | Performance improvement of genetic algorithm for multiple sequence alignment.                                                                                           | [50]   |
| 3  | Improvements in the sensibility of MSA-GA tool using COFFEE objective function.                                                                                         | [52]   |
| 4  | A hybrid genetic algorithm with chemical reaction optimization for multiple sequence alignment.                                                                         | [33]   |
| 5  | Genetic algorithms and dynamic weighted sum method for RNA alignment.                                                                                                   | [48]   |
| 6  | Multiple sequence alignment with affine gap by using multi-objective genetic algorithm.                                                                                 | [49]   |
| 7  | An enhanced algorithm for multiple sequence alignment of protein sequences using genetic algorithm.                                                                     | [47]   |
| 8  | Application of genetic algorithm by influencing the crossover parameters for multiple sequence alignment.                                                               | [53]   |
| 9  | Multi-objective formulation of multiple sequence alignment for phylogeny inference.                                                                                     | [54]   |
| 10 | A Hybrid Approach using Progressive and Genetic Algorithms for Improvements in Multiple Sequence Alignments.                                                            | [22]   |
| 11 | Parallel multiple DNA sequence alignment using genetic algorithm and asynchronous advantage actor critic model.                                                         | [55]   |
| 12 | A hybrid genetic algorithm with chemical reaction optimization for multiple sequence alignment.                                                                         | [56]   |
| 13 | A bi-objective function optimization approach for multiple sequence alignment using genetic algorithm.                                                                  | [57]   |
| 14 | Parallel niche pareto AlineaGA—an evolutionary multi-objective approach on multiple sequence alignment.                                                                 | [58]   |
| 15 | Optimizing multiple sequence alignments using a genetic algorithm based on three objectives: structural information, non-gaps percentage and totally conserved columns. | [59]   |
| 16 | Cyclic genetic algorithm for multiple sequence alignment.                                                                                                               | [60]   |
| 17 | Progressive alignment method using genetic algorithm for multiple sequence alignment.                                                                                   | [51]   |
| 18 | Vertical decomposition with genetic algorithm for multiple sequence alignment.                                                                                          | [61]   |
| 19 | A genetic algorithm based approach for the optimization of multiple sequence alignment.                                                                                 | [12]   |
| 20 | A multigroup parallel genetic algorithm for multiple sequence alignment.                                                                                                | [62]   |
| 21 | A new genetic algorithm for multiple sequence alignment.                                                                                                                | [63]   |
| 22 | Multiple sequence alignment with multi-objective metaheuristics. a comparative study.                                                                                   | [64]   |
| 23 | Multi-objective two-level swarm intelligence approach for multiple RNA sequence-structure alignment.                                                                    | [66]   |

|    |                                                                                                                                                  |       |
|----|--------------------------------------------------------------------------------------------------------------------------------------------------|-------|
| 24 | A novel two-level particle swarm optimization approach for efficient multiple sequence alignment.                                                | [20]  |
| 25 | NestMSA: a new multiple sequence alignment algorithm.                                                                                            | [65]  |
| 26 | Particle swarm optimization with tabu search algorithm (PSO-TS) applied to multiple sequence alignment problem.                                  | [10]  |
| 27 | ProbPFP: a multiple sequence alignment algorithm combining hidden Markov model optimized by particle swarm optimization with partition function. | [67]  |
| 28 | DNA sequence compression using adaptive particle swarm optimization-based memetic algorithm.                                                     | [90]  |
| 29 | A characteristic-based framework for multiple sequence aligners.                                                                                 | [89]  |
| 30 | Parallel H4MSA for multiple sequence alignment.                                                                                                  | [88]  |
| 31 | A hybrid multi-objective memetic metaheuristic for multiple sequence alignment.                                                                  | [13]  |
| 32 | A Comparison between Memetic algorithm and Genetic algorithm for the cryptanalysis of Simplified Data Encryption Standard algorithm.             | [87]  |
| 33 | A Memetic Cellular Genetic Algorithm for Multiple Sequence Alignment.                                                                            | [86]  |
| 34 | An algorithm of multiple sequence alignment based on consensus sequence searched by simulated annealing and star alignment.                      | [91]  |
| 35 | Protein multiple sequence alignment by basic flower pollination algorithm.                                                                       | [92]  |
| 36 | Flower pollination algorithm with profile technique for multiple sequence alignment.                                                             | [93]  |
| 37 | Multiple sequence alignment using a multi-objective artificial bee colony algorithm.                                                             | [94]  |
| 38 | A Multi-objective Artificial Bee Colony Algorithm for Multiple Sequence Alignment.                                                               | [14]  |
| 39 | A Decomposition and Dominance-Based Multi-objective Artificial Bee Colony Algorithm for Multiple Sequence Alignment.                             | [95]  |
| 40 | Hybrid multiobjective artificial bee colony for multiple sequence alignment.                                                                     | [96]  |
| 41 | Artificial bee colony algorithm for solving multiple sequence alignment.                                                                         | [97]  |
| 42 | IBBOMSA: An improved biogeography-based approach for multiple sequence alignment.                                                                | [102] |
| 43 | A new hybrid bio-inspired approach to resolve the multiple sequence alignment problem.                                                           | [98]  |
| 44 | Multiple sequence alignment using multi-objective based bacterial foraging optimization algorithm.                                               | [74]  |
| 45 | Bacterial foraging optimization–genetic algorithm for multiple sequence alignment with multi-objectives.                                         | [99]  |

**Table S2.** Overview of the relevant MSA review publications.

| Reference | Year | Scope and content                  | SLR | Benchmarks dataset | Evaluation Measures | Open Issues |
|-----------|------|------------------------------------|-----|--------------------|---------------------|-------------|
| [26]      | 2014 | survey of benchmarks for MSA.      | -   | -                  | -                   | -           |
| [24]      | 2016 | Metaheuristics for bioinformatics. | -   | -                  | -                   | -           |
| [6]       | 2016 | MSA modeling.                      | -   | -                  | -                   | -           |

|          |      |                                                          |   |   |   |   |
|----------|------|----------------------------------------------------------|---|---|---|---|
| [8]      | 2017 | Comparison of the metaheuristic quality measures.        | - | - | ✓ | - |
| [40]     | 2017 | Review Genetic algorithm for MSA.                        | - | - | - | - |
| [69]     | 2021 | Metaheuristic-based review for MSA.                      | ✓ | - | - | - |
| [31]     | 2022 | Nature Inspired Algorithms MSA Problem.                  | - | - | - | - |
| [36]     | 2022 | Algorithms for Sequence Alignment.                       | - | - | - | - |
| [41]     | 2022 | Parallel protein multiple sequence alignment approaches. | - | - | - | - |
| Proposed | 2024 | Bioinspired Algorithms for MSA.                          | ✓ | ✓ | ✓ | ✓ |

**Table S3.** Quality Checklist.

| NO. | Question                                                                 |
|-----|--------------------------------------------------------------------------|
| SQ1 | Is the report coherent and clear?                                        |
| SQ2 | Is the method used for the data collection clearly explained?            |
| SQ3 | Is the primary research objective clearly mentioned?                     |
| SQ4 | Are the main study findings credible?                                    |
| SQ5 | Are the diversity contexts been clearly investigated?                    |
| SQ6 | Is there a clear link between the data, conclusion, and interpretations? |
| SQ7 | Are the research procedures adequately documented?                       |
| SQ8 | Are the methodology and experimentations clearly stated?                 |
| SQ9 | Is it possible to replicate the research findings?                       |
